# Supplementary material for: Developmental RNA-Seq transcriptomics of haploid germ cells and spermatozoa uncovers novel pathways associated with teleost spermiogenesis
Source: PubMed Central journal article supplement (PMC9391476; doi:10.1038/s41598-022-18422-2), 2022-08-19
Supplement: 41598_2022_18422_MOESM3_ESM.pdf [file 41598_2022_18422_MOESM3_ESM.pdf]

## Supplementary Table S6

### Nucleotide sequences of the primers employed for qRT-PCR

| GenBank accession | Transcript symbol | Forward sequence       | Reverse sequence       |
|-------------------|-------------------|------------------------|------------------------|
| XM_030407493      | <i>aco2</i>       | CCCCGATGACAAGATTTCAA   | CAGCCTGGAACCACTCAATC   |
| XM_030406939      | <i>actb</i>       | CCAAAGCCAACAGGGGAGAAG  | AGATGGGTACTGTGTGGGTCA  |
| XP_030261683      | <i>ak7</i>        | GTTGGACTGCAGCAAGATCA   | CTCATCACAACCGGAGCTGA   |
| XM_030422127      | <i>akt3</i>       | GGAGACGGACACACGCTACT   | GGAGAACTGTGGGAAATGAGG  |
| XP_030292248      | <i>alad</i>       | CAGGGAATGTGCTGTGTGTG   | GAGGCAGCAGTCACACGATA   |
| XP_030255569      | <i>aldoa-1</i>    | CGGTGGAGAGTCCCTGTTT    | GTTAGGCGTTAGTGCCGAAGT  |
| XP_030286254      | <i>alox5</i>      | CCCAGGAGCAGATTGACAAG   | TGAATCCCTCTTGGAACAGAC  |
| KC589386          | <i>aqp7</i>       | TGAAGGACTTGGTGCAGTCA   | CCTAGGCCAAACACCATCAT   |
| XP_030249041      | <i>ash11</i>      | AAGAGGAGAGAGGGCCAGAG   | GTCACCCTCGGGTTTATCCT   |
| XM_030439663      | <i>braf</i>       | GCTGTTGGCTCGCTCATTAC   | GATAGGGGTTTTGGGTGAGG   |
| XM_030404141      | <i>casp8</i>      | GGGGTGACGACATAACAACC   | GAGCTTCATTTCTGTTGTGGTG |
| XP_030299278      | <i>ccr6</i>       | TCCGAGATCTCGTGTCTACT   | TTCCTGGTCCAGCAGATGCC   |
| XP_030299721      | <i>ccr6-1</i>     | GCTGTGCGGGCAGAAAAGAT   | CTCCGGAACCTTACCCCAAT   |
| XP_030281295      | <i>cdk10</i>      | ACCCTGTGAACCAGAGCTGA   | CCAGCTGTCTCATCATCACTG  |
| XP_030261875      | <i>chac1</i>      | CGTGGATGACAATCACCTGT   | GTGGAAAGCCTCTGTCGTGT   |
| XP_030262161      | <i>csc1</i>       | GCCCAAACCTCAGCAGTCTTA  | GATTTACGATCGGGAGTTGC   |
| XP_030250969      | <i>ctss</i>       | ACCACGCTGTGTTAGCTGTG   | CAGAGTGATGCCACACTGGT   |
| XM_030395723      | <i>cxcr5</i>      | CCACTTTCGCAATGAGCTG    | TGGAGCTGGTGGTTGTTACTC  |
| XP_030293664      | <i>egr1</i>       | CCCCCTCTACTCTCTCCTC    | AGGTCAGAGCCAGCAGATGG   |
| XM_030411705      | <i>elmo1</i>      | CTCCTGGGGAAAGGAGATGAC  | CTGGGTTCTTTGGGAATCG    |
| XM_030436654      | <i>fbp1</i>       | CGATGACGTGCAGGAGTATCT  | TGCAGCTGAAGGAGTGAGTG   |
| XM_030399511      | <i>g6pc3</i>      | CGTCCCTGGACTGGTTCAT    | CCCACAAGAGTACCCGTGAA   |
| XP_030279426      | <i>g6pd</i>       | GGTGGCCAGAGGGAAATAGT   | ATAGAGCTCCCTCCTGAGCTG  |
| XP_030259080      | <i>glul</i>       | GCCAGGAGAAGAAGGGCTAC   | TAAAGTCAGGAGGGCAGTGG   |
| XP_030271495      | <i>gnrh1r</i>     | CCAAACGACTGAGAAAGGACA  | AACGGTGTGTTGTGTCGAGGT  |
| XP_030269490      | <i>gnrh2r</i>     | CTGCTTGGATCCCATCATCT   | GGAGAACCACATCTGCCTGT   |
| XP_030280787      | <i>gnrh3r</i>     | CCGTAAGTCGAGAGATGTGC   | CCTTCTGTTTCACTCCTCGTG  |
| XP_030281022      | <i>gpi-1</i>      | CTGTCTGTGTGGTCTGTCAGG  | CTGGTAGAAGGCGTGTCTGC   |
| XP_030253049      | <i>gpx3</i>       | GTTCTGGCAGCCTATGAAGC   | GAGCAGGTATCTGCGGATGT   |
| XP_030274648      | <i>itpr1</i>      | AGCAGAGGAAGCAGAAGCAG   | GCACAGTCAGGAGTGCTCAG   |
| XP_030281751      | <i>itpr2</i>      | AGCAGATGACGGAACAGAGG   | GGCTTGAGTTTGTGTCTGCTT  |
| XP_030290448      | <i>jak1</i>       | GTTGAGCAGGCAACTCTGTG   | AGTGTAACAGCCGCTGAGGT   |
| XM_030416057      | <i>jak2</i>       | TTTGGCTCTTCTTTCAAGG    | TAAAGAGCGACTCGGCTGAC   |
| XP_030290270      | <i>jun</i>        | GAAGGTGATGAACCACGTCA   | CGTTTCTGTTCAACCACAGTC  |
| XP_030278504      | <i>kcnc4</i>      | ACCCCAACGTCCATACTGAG   | CAGCTCTGCACAGCGTCTAC   |
| XP_030272802      | <i>kin1ae</i>     | CAGGACTCTCTGGGTGGAAA   | TCTTTGCTGTCCACATTTCCG  |
| XP_030259646      | <i>lrrc8d</i>     | GTTTCAGATGCACCAAGCTCA  | TAAAGGGTGC GTTGTCTCTCT |
| XP_030263907      | <i>map2k4</i>     | GACGAGTCAAAAAGGCCAAA   | CATCGGTGAGCTGGGAGA     |
| XP_030256967      | <i>mapk7</i>      | CTCTCGGCCTCCCTCTTATC   | TCAGGGGGAATGGTATCAGA   |
| XP_030281999      | <i>mapk12</i>     | GACCACTGGTGGACAACCTC   | CTGCACAGTCGAGTCTTCGT   |
| XP_030287334      | <i>mmp14</i>      | GAGCGCTTTTGTCTTCAGG    | CCTCGTCTCTGTCCCTCTG    |
| XP_030260647      | <i>mrpl19</i>     | TCCAAACTGGAGGAGCAGAT   | GATCAGCAGCAGTGTTCAGC   |
| XP_030251358      | <i>pik3cb</i>     | ACTCACGACTTCATCCACGTC  | CATGAGGGCAAACAGTGTGA   |
| XP_030294082      | <i>pdgfrb</i>     | AGCCCTCAGCTGTCAGAATC   | GGTCTGAAAGGCAGCTGAAC   |
| XP_030255317      | <i>pdk1</i>       | TCCTGAAAGGGGAGATTCTC   | CCTGGATCTTCTGCACCAT    |
| XP_030271603      | <i>pgam1</i>      | GCGCTCTTTTGACACTCCTC   | CTGGCGATGGTATCCTTCAG   |
| XM_030441586      | <i>pgam1-1</i>    | GCTCGACAAGAACCTGAAGC   | GAGGCGACTTCTCAGTCACTTT |
| XP_030271414      | <i>pkm</i>        | GATGTGTGGGCAGAGGATGT   | GCGCATGGTGTGGTGTGA     |
| XM_030424984      | <i>plcz1</i>      | CACTGGGATGCTGACATGAA   | CAGCGGTAGCCTCTCTTCAG   |
| XP_030292336      | <i>prkaal</i>     | GGAAGCCACACCATTGAGTT   | CGGTTGCATGCTTATTGCTA   |
| XP_030268357      | <i>prkcb</i>      | CCCCAGATCAGGAGCTTAT    | TCTGAGGTGTGGGGGATTAC   |
| XP_030287375      | <i>ptgdr2</i>     | CAGCACCAGTGAGACTGCAT   | CCTGGGCACATTAACATACG   |
| XP_030296439      | <i>ptpr</i>       | AGCCGACAGAGGAGGTATGA   | GCACACTTCTGGTTCAGGT    |
| XP_030277815      | <i>raf1</i>       | GCGAATGAGGGAATCCTTAAC  | AACACCCAGCCACTGAAGAT   |
| XP_030254189      | <i>rec8</i>       | TGCAGCTCACACCTCTACA    | GCCTAAAGGACTAGCGTTGG   |
| XP_030287257      | <i>tesk1</i>      | AAGAACTTGAATGGGGACCA   | TTGGTGCAGAGTTTCGACAT   |
| XP_030289820      | <i>tie1</i>       | GCCAGGAAGGCTTATGTGAA   | GGACTTTCTCCTCGGGCTAC   |
| XP_030256345      | <i>timp2</i>      | TGCTCCTGTGTCTGCTGTCT   | CCTTCTTCTGGGTGTTGCTC   |
| XM_030423559      | <i>tkt2</i>       | ACCTTTGCAAACTGAGGACTGT | ACAATAGGTGCACACAGTGGAG |
| XP_030252175      | <i>tlr1</i>       | CAACCAGCTGAAGTCCATGA   | GGGTAGATGGATTTCCTCA    |
| XP_030265677      | <i>tuba4a</i>     | GGATGGAGGAGGGGAGGTTT   | GGCTTTTCTTTGTGGCAGAT   |
| XP_030251226      | <i>spdl1</i>      | CCCCACTCTCTGTAAAGTG    | TGCTGAGCACATTTGGTTTC   |
| XP_030281360      | <i>slc28a2</i>    | CCTCCACTTGACTGTGTGGA   | TTCAGACCAGGAAGTCCACA   |
| XP_030262590      | <i>stat3</i>      | CTGATGCACAATGAAGCTGAA  | GGGAGAATCCTCCATCACAAC  |
| XM_030414700      | <i>vav1</i>       | GCCAACTATGTGGAGGAGGA   | GTGCACATGGGTAAATGCAA   |
| XP_030276225      | <i>vdrb</i>       | GCTCTACGCCAAGATGATCC   | GCAGCCTCTAGGAGACTTCG   |
